# Supplementary material
Source: Springer Nature journal article supplement (https://www.springermedizin.de/resource/supplementary/12902_2006_28_MOESM1_ESM.pdf/9516092)

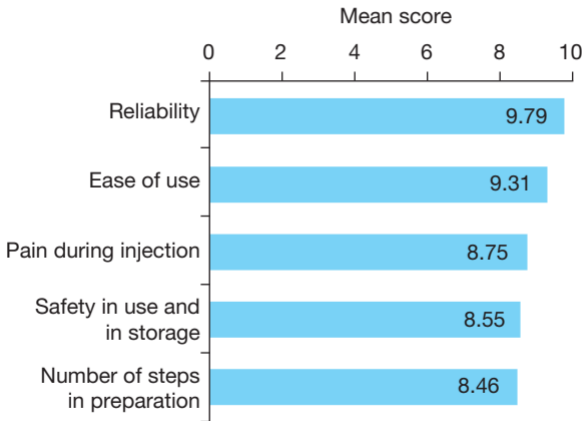

Supplement: MOESM1 [file 9516092]
